# Supplementary material for: Competition between glutathione and DNA oligonucleotides for ruthenium(ii) arene anticancer complexes
Source: Royal Society of Chemistry journal article supplement (doi:10.1039/c2dt32091f), 2012-10-18
Supplement: c2dt32091f.pdf [file c2dt32091f.pdf]

DT-ART-09-2012-032091

**Competition between Glutathione and DNA Oligonucleotides for  
Ruthenium(II) Arene Anticancer Complex**

Fuyi Wang, Jingjing Xu, Kui Wu, Stefan K. Weidt, C. Logan Mackay, Pat R.R.  
Langridge-Smith and Peter J. Sadler\*

**Electronic Supplementary Information**

Table S1

Figure S1

**Table S1.**  $^1\text{H}$  NMR chemical shift assignments (ppm) observed for imino protons of duplex **III** in this work and reported in the literature<sup>31</sup> (J. A. Parkinson, Y. Chen, P. D. Murdoch, Z. J. Guo, S. J. Berners-Price, T. Brown and P. J. Sadler, *Chem. Eur. J.*, 2000, 6, 3636).

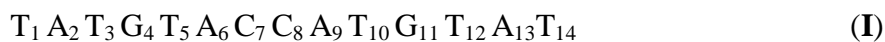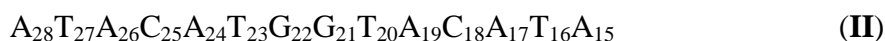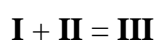

| Base                                | GH1/TH3 <sup>c</sup> | GH1/TH3 (ref 31) |
|-------------------------------------|----------------------|------------------|
| T23 <sup>a</sup> (T6 <sup>b</sup> ) | - <sup>d</sup>       | 13.54            |
| G22(G7)                             | 12.52                | 12.55            |
| G21(G8)                             | 12.64                | 12.69            |
| T12(T17)                            | 13.31                | 13.40            |
| G11(G18)                            | 12.38                | 12.42            |
| T10(T19)                            | - <sup>d</sup>       | 13.48            |
| T5(T24)                             | - <sup>d</sup>       | 13.51            |
| G4(G25)                             | 12.32                | 12.37            |
| T3(T26)                             | 13.31                | 13.40            |

<sup>a</sup> The numbering for duplex **III** used in this work;

<sup>b</sup> The numbering for duplex **III** used in the literature;<sup>31</sup>

<sup>c</sup> The numbering is shown in Figure S1(C);

<sup>d</sup> The signals are weak and the three peaks are overlapped.

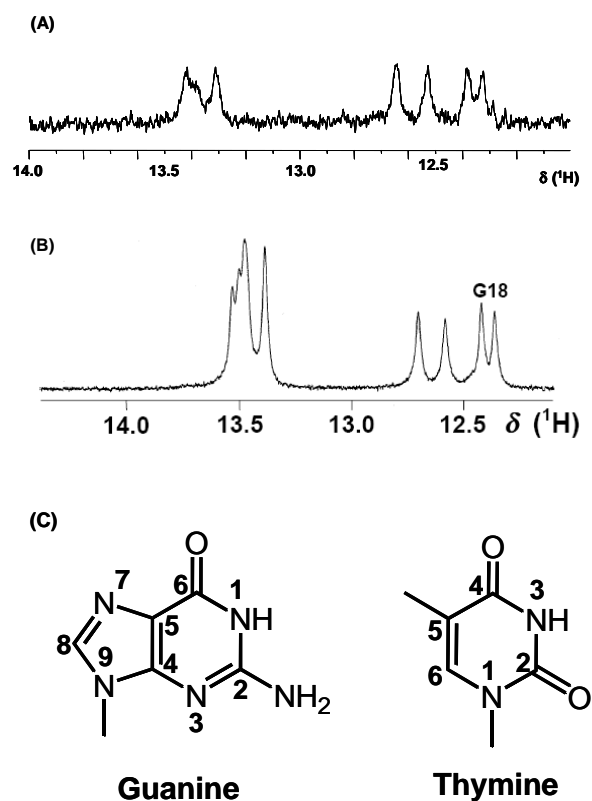

**Figure S1.** (A) The imino region of the <sup>1</sup>H NMR spectrum of **III** obtained at 288 K; (B) The same region of <sup>1</sup>H NMR spectrum of **III** at 278 K as published previously in the reference<sup>31</sup> (J. A. Parkinson, Y. Chen, P. D. Murdoch, Z. J. Guo, S. J. Berners-Price, T. Brown and P. J. Sadler, *Chem. Eur. J.*, 2000, **6**, 3636). (C) The chemical structures and numbering for the guanine and thymine bases.
